# Supplementary material for: Engineering bacteria to control electron transport altering the synthesis of non-native polymer
Source: Royal Society of Chemistry journal article supplement (doi:10.1039/d1ra06403g), 2021-12-21
Supplement: d1ra06403g1.pdf [file d1ra06403g1.pdf]

### Supporting Information

## **Engineering Bacteria to Control Electron Transport Altering the Synthesis of Biopolymer**

*Mechelle R. Bennett,* <sup>[a]</sup> *Akhil Jain,* <sup>[a, b]</sup> *Katalin Kovacs,* <sup>[b]</sup> *Phil J. Hill,* <sup>[c]</sup> *Cameron Alexander,* <sup>[d]</sup>  
*Frankie J. Rawson*\* <sup>[a]</sup>

[a] Division of Regenerative Medicine and Cellular Therapies, Biodiscovery Institute,  
School of Pharmacy, University of Nottingham, University Park, Nottingham, NG7 2RD

\*E-mail: Frankie.Rawson@nottingham.ac.uk

[b] Synthetic Biology Research Centre, School of Life Sciences, University of  
Nottingham, University Park, Nottingham, NG7 2RD

[c] Division of Microbiology, Brewing and Biotechnology. School of Bioscience,  
University  
of Nottingham, Sutton Bonington Campus, Nottingham LE15 5RD

[d] Division of Molecular Therapeutics and Formulation, Boots Science Building, School  
of Pharmacy, University of Nottingham, University Park, Nottingham, NG7 2RD

**Table S1. Bacteria and Plasmid Strains.**

| Strain/Plasmid                       | Description                                                                  | Source/Reference                                                                          |
|--------------------------------------|------------------------------------------------------------------------------|-------------------------------------------------------------------------------------------|
| <i>Escherichia coli</i><br>wild type | Plasmid Storage Strain (K12 Top 10)                                          | Invitrogen                                                                                |
| pMTL_83153                           | Modular plasmid containing pCB102, catP, ColE1 + tra, P <sub>fdx</sub> + MCS | <a href="http://www.clostron.com/pMTL80000.php">http://www.clostron.com/pMTL80000.php</a> |

**Table S2.** Oligonucleotide Primers used for PCR of DNA regions. All Primers used for PCR with Q5 ® Polymerase. \*Exceptions used for Colony PCR with Green DreamTaq.

| Primers                    | Sequence (5'-3')                               | Tm (°C) | Function                                                               |
|----------------------------|------------------------------------------------|---------|------------------------------------------------------------------------|
| NapC_fwd_hifi              | GAGCGAAATCATGGGAA<br>ATTCTGACCGTAAG            | 61.8    | To amplify <i>napC</i> in cloning with <b>P<sub>BAD</sub> promoter</b> |
| NapC_rev_hifi              | ATCTCCATGGACGCGTG<br>ACGTTAAAAACCTGGCTC<br>GAC | 59.3    | To amplify <i>napC</i> in cloning with <b>P<sub>BAD</sub> promoter</b> |
| P <sub>BAD</sub> _araC-fwd | CAGGAAACAGCTATGAC<br>CGCTTATGACAACTTGAC<br>GGC | 59.3    | Amplify <b>P<sub>BAD</sub> promoter</b>                                |
| P <sub>BAD</sub> _araC_rev | AATTTCCCATTTTCTCCT<br>CTTTAATCTAGAGAATTC       | 58.9    | Amplify <b>P<sub>BAD</sub> promoter</b>                                |
| ColE + <i>tra</i> _F2*     | CCATCAAGAAGA GCGAC                             | 56.7    | <b>Colony PCR</b>                                                      |
| pCB102_R1*                 | GATAGTCAAAGGCATAA<br>CAG                       | 55.4    | <b>Colony PCR</b>                                                      |

**Table S3.** Arabinose induction concentrations for *E. coli* containing Inducible Promoter Vector.

| Sample | Stock arabinose (w/v) | Final arabinose Concentration |
|--------|-----------------------|-------------------------------|
|--------|-----------------------|-------------------------------|

|                               |         |           |
|-------------------------------|---------|-----------|
| <i>E. coli</i> (IP_0%)        | 0       | 0         |
| <i>E. coli</i> (IP_0.000018%) | 0.0018% | 0.000018% |
| <i>E. coli</i> (IP_0.0018%)   | 0.18%   | 0.0018%   |
| <i>E. coli</i> (IP_0.18%)     | 18%     | 0.18%     |

**Table S4.** Protein standardisation calculations using BCA assay. \*Calculated using BSA equation ( $y=0.0016x$ ). \*\*Note samples were diluted by 2; therefore, the concentrations were doubled to obtain original solution concentrations.

| Vector                        | Abs <sub>562nm</sub><br>(av) | Sample<br>conc<br>( $\mu\text{g/mL}$ )* | Original<br>conc<br>( $\mu\text{g/mL}$ ** | mg/ml |
|-------------------------------|------------------------------|-----------------------------------------|-------------------------------------------|-------|
| Empty Plasmid                 | 1.57                         | 982.7                                   | 1965                                      | 1.97  |
| <i>E. coli</i> (IP_0%)        | 1.63                         | 1019                                    | 2038                                      | 2.04  |
| <i>E. coli</i> (IP_0.000018%) | 1.69                         | 1053                                    | 2106                                      | 2.11  |
| <i>E. coli</i> (IP_0.0018%)   | 1.65                         | 1029                                    | 2058                                      | 2.06  |
| <i>E. coli</i> (IP_0.18%)     | 1.40                         | 873                                     | 1746                                      | 1.75  |

**Table S5.** Reagent ratios for *E. coli*<sub>IP</sub> initiated Fe ATRP.

| Reagent                              | Ratio | Mmol   | Mass (mg) | Vol ( $\mu\text{L}$ ) |
|--------------------------------------|-------|--------|-----------|-----------------------|
| PEGMA                                | 100   | 0.052  | 17        | 16.2                  |
| FeCl <sub>3</sub> .6H <sub>2</sub> O | 4.65  | 0.0024 | 0.65      | -                     |
| Me <sub>6</sub> TREN                 | 13.95 | 0.0072 | 1.7       | 1.9                   |
| HEBIB                                | 2     | 0.0010 | 0.22      | 0.15                  |

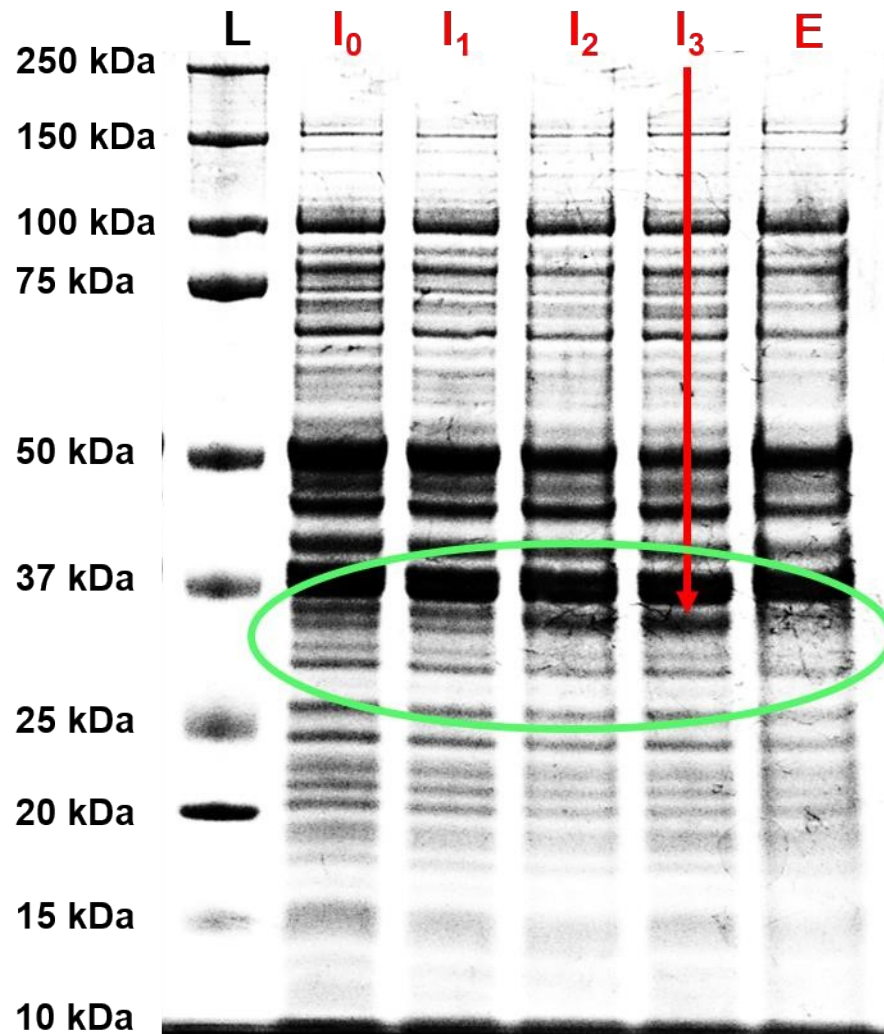

**Figure S1.** Protein expression analysis. SDS PAGE Gel for lysates of bacteria containing empty plasmid (E), Inducible promoter vector with 0% (I<sub>0</sub>), 0.000018% (I<sub>1</sub>), 0.0018% (I<sub>2</sub>) and 0.18% (I<sub>3</sub>) total arabinose concentration induction. Protein Gel against Precision Plus Protein™ Kaleidoscope ladder (L).

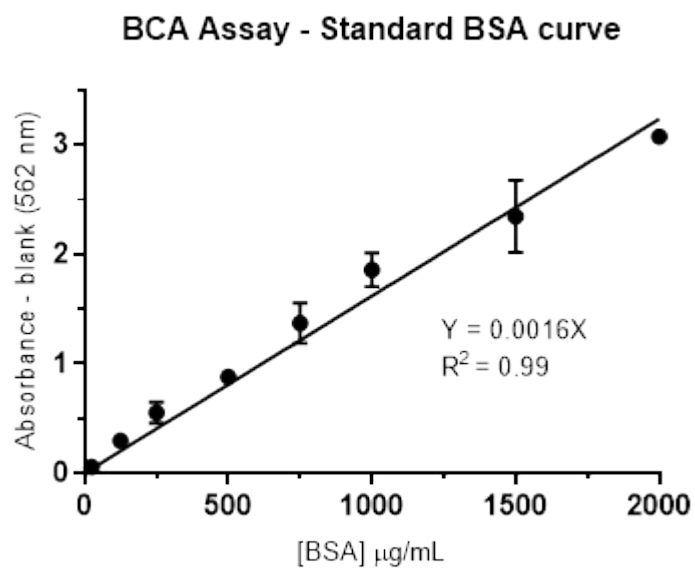

**Figure S2.** BCA Standard curve for BSA (Bovine Serum albumin).

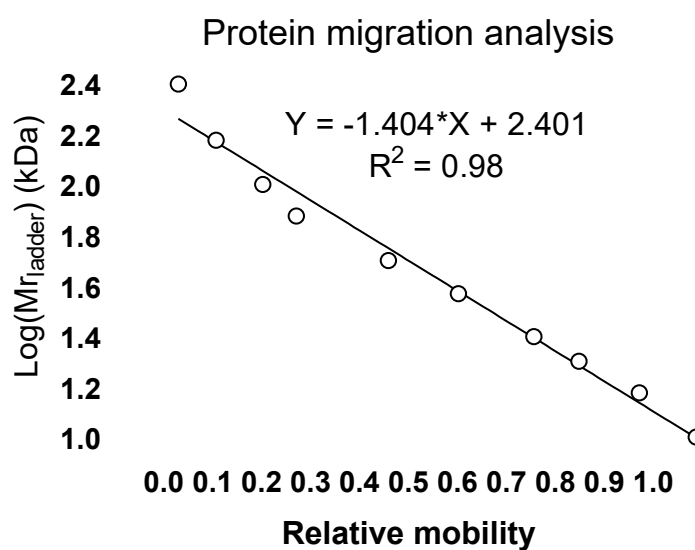

**Figure S3.** Protein migration analysis of protein ladder Log( $M_r$ ) against relative mobility on SDS PAGE Gel.

### Calculation:

Migration (NapC) = 10.7 cm Dye

front = 17.2 cm

$$\text{Relative mobility (X)} = \frac{\text{migration}}{\text{dye front}} = \frac{10.7}{17.2} = 0.622$$

$$\text{Log}(Mr_{NapC}) = [-(1.404 * X) + 2.401]$$

$$\text{Log}(Mr_{NapC}) = (-1.404 * 0.622) + 2.401$$

$$Mr_{NapC} = 10^{((-1.404*0.622)+2.401)} = 33.7 \text{ kDa}$$

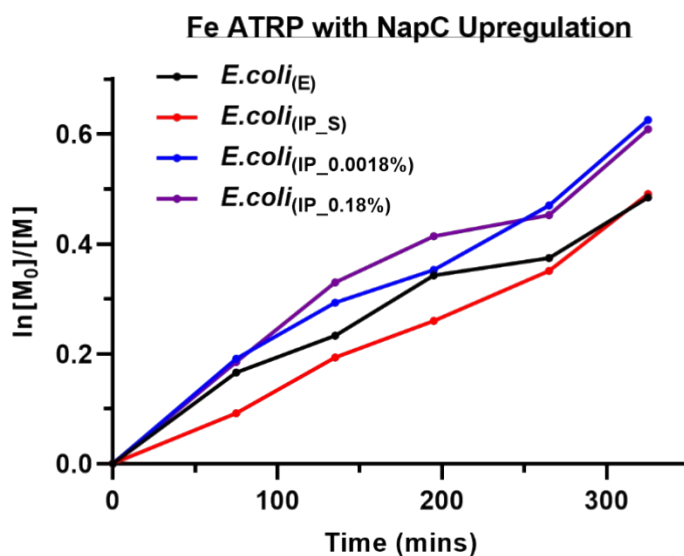

**Figure S4.**  $^1\text{H}$  NMR kinetics of Fe ATRP activated by *E. coli* harbouring empty plasmids,  $E. coli_{(E)}$ , or inducible promoter plasmids,  $E. coli_{(IP)}$  either i) suppressed by addition of glucose  $E. coli_{(IP\_S)}$ , ii) activated by 0.0018% total arabinose concentration  $E. coli_{(IP\_0.0018\%)}$  or ii) activated by 0.18% total arabinose concentration  $E. coli_{(IP\_0.18\%)}$ .

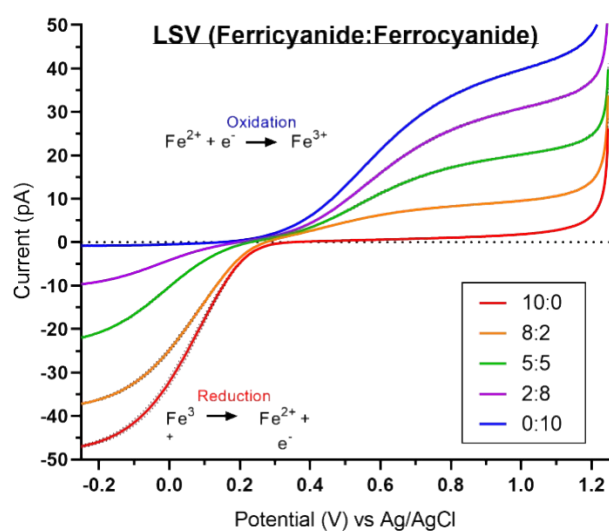

**Figure S5.** Linear sweep voltammogram of Current Vs Potential carried out using 3 electrode system with carbon fibre micro-disk electrode (33  $\mu\text{m}$ ), Ag/AgCl reference electrode and Pt counter electrode in 1X PBS electrolyte. Scans were carried out at 100 mV/s from 1.25 V to -0.25 V. 1 mM potassium ferricyanide and ferrocyanide were made in PBS (1X) and mixed in ratios (10:0, 8:2, 5:5, 2:8, 0:10) and voltammograms observed (n=3, error = SD) for each sample, where electrode was polished between each scan.

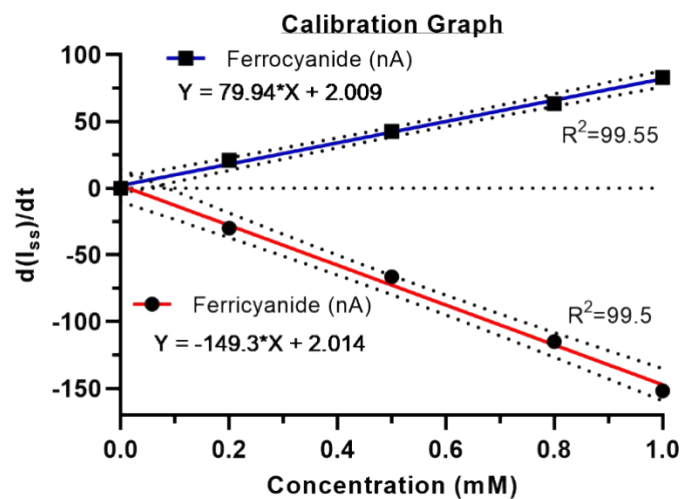

**Figure S6.** Calibration curve to determine Fe concentration. First derivative peaks from graphs in figures S5 and 3a against Ferricyanide or ferrocyanide concentration with line of best fit and 95% confidence limit.



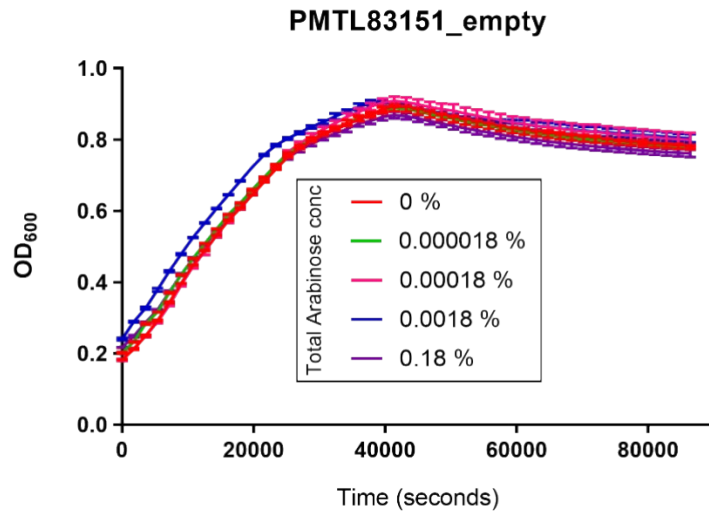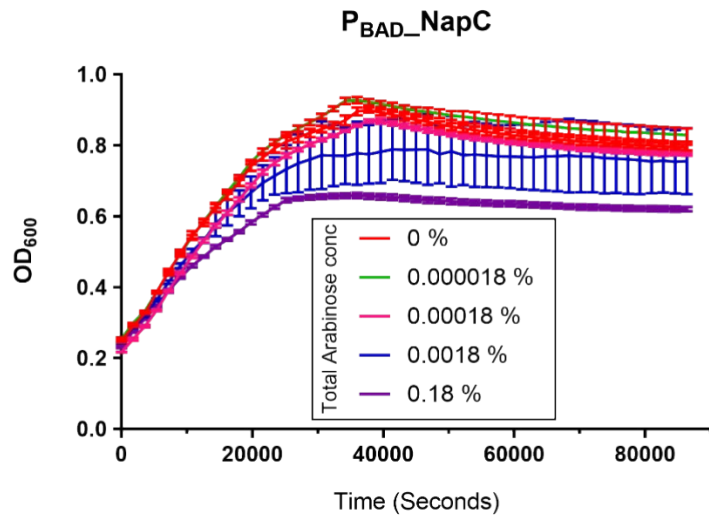

**Figure S7.** Arabinose toxicity study for, Top: *E. coli* containing empty plasmid and Bottom: *E. coli* containing Inducible vector Plasmid at different arabinose concentrations.
